# Supplementary material
Source: MDPI journal article supplement (https://www.mdpi.com/2221-3759/10/1/14)
Supplement: s1 [file s1]

**Table S1. PCR primer sequences.**

| <b>Gene</b> | <b>Forward Primer</b> | <b>Reverse Primer</b>  |
|-------------|-----------------------|------------------------|
| mALP        | AACAACCTGACTGACCCTTCG | AATCCTGCCTCCTTCCACC    |
| mOCN        | CAGGAGGGCAATAAGGTAGT  | CGTAGATAGCGTTTGTAGGC   |
| mRUNX2      | TTCTCCAACCCACGAATGCAC | CAGGTACGTGTGGTAGTGAGT  |
| mCOL1A      | ACTGGTACATCAGCCCGAAC  | TACTCGAACGGGAATCCATC   |
| mYAP1       | ACCCTCGTTTTGCCATGAAC  | CCTTCTCCATCTGTAACTGC   |
| mACTIN      | GCTACAGCTTCACCACCACA  | TCTCCAGGGAGGAAGAGGAT   |
| hALP        | CAACCCTGGGGAGGAGAC    | GCATTGGTGTTGTACGTCTTG  |
| hOCN        | GACTGTGACGAGTTGGCTGA  | AGCAGAGCGACACCCTAGAC   |
| hRUNX2      | CGGAATGCCTCTGCTGTTAT  | TGAAACTCTTGCCTCATCCA   |
| hCOL1A      | GGAGCTCCAAGGACAAGAAA  | ATGAAGGCAAGTTGGGTAGC   |
| hACTIN      | TTGCTGACAGGATGCAGAAG  | GTACTIONGCGCTCAGGAGGAG |
